# Supplementary material for: The consolidated European synthesis of CO 2 emissions and removals for EU27 and UK: 1990–2020
Source: Copernicus journal article supplement (doi:10.5194/essd-2022-412), 2023-01-26
Supplement: Supplementary file [file essd-2022-412-AC1-supplement.pdf]

|              |                  | Original manuscript |      |       |       | Revised manuscript |      |             |          |
|--------------|------------------|---------------------|------|-------|-------|--------------------|------|-------------|----------|
|              |                  | Start               | Stop | Total | # Fig | Start              | Stop | Total       | # Fig    |
| Abstract     |                  | 63                  | 104  | 41    | 0     | 67                 | 110  | 43          | 0        |
| Introduction |                  | 107                 | 188  | 81    | 0     | 112                | 218  | 106         | 0        |
| Methods      |                  |                     |      |       |       |                    |      |             |          |
|              | Overview         | 191                 | 239  | 48    | 0     | 221                | 271  | 50          | 0        |
|              | NGHGI            | 242                 | 252  | 11    | 0     | 274                | 287  | 13          | 0        |
|              | Fossil           | 255                 | 284  | 29    | 0     | 290                | 326  | 36          | 0        |
|              | Land             | 290                 | 370  | 80    | 0     | 332                | 425  | 93          | 0        |
|              | Independence     | -                   | -    | -     | -     | 428                | 458  | 30          | 0        |
| Results      |                  |                     |      |       |       |                    |      |             |          |
|              | Synthesis        | 373                 | 431  | 58    | 1     | 462                | 537  | 75          | 1        |
|              | Fossil           | 434                 | 480  | 46    | 1     | 540                | 589  | 49          | 1        |
|              | Land             | 485                 | 1149 | 664   | 9     | 593                | 1061 | <b>468</b>  | <b>4</b> |
|              | --Intro          | 485                 | 522  | 37    | 0     | 593                | 637  | 44          | 0        |
|              | --Decade         | 526                 | 577  | 51    | 1     | -                  | -    | <b>0</b>    | <b>0</b> |
|              | --Overview of BU | 580                 | 589  | 9     | 0     | 641                | 650  | 9           | 0        |
|              | --FL             | 592                 | 674  | 82    | 2     | 654                | 721  | 67          | <b>1</b> |
|              | --CL             | 678                 | 753  | 75    | 1     | 725                | 817  | <b>92</b>   | <b>1</b> |
|              | --GL             | 756                 | 807  | 51    | 1     |                    |      |             |          |
|              | --BU             | 811                 | 921  | 110   | 1     | 821                | 978  | <b>157</b>  | <b>1</b> |
|              | --TD             | 925                 | 1024 | 99    | 1     |                    |      |             |          |
|              | --Uncert         | 1026                | 1149 | 123   | 2     | 982                | 1061 | 59          | <b>1</b> |
| Conclusion   |                  | 1161                | 1288 | 127   | 0     | 1079               | 1212 | 133         | 0        |
| Total        |                  | 63                  | 1288 | 1225  | 11    | 67                 | 1212 | <b>1145</b> | <b>6</b> |
